# Supplementary material
Source: PubMed Central journal article supplement (PMC3568558)
Supplement: AEM.02767-12_zam999104072so1.pdf [file AEM.02767-12_zam999104072so1.pdf]

TABLE S1: Cell shape/cell cycle-related *E. coli* O157:H7 genes that were differentially expressed at 2 and 4 h exposure to cinnamaldehyde

| Gene                       | Function                                                                        | Fold change         |
|----------------------------|---------------------------------------------------------------------------------|---------------------|
|                            |                                                                                 | (log <sub>2</sub> ) |
|                            |                                                                                 | 4 h                 |
| <i>alr</i>                 | alanine racemase 1                                                              | 2.8                 |
| <i>ftsW</i>                | cell division protein                                                           | 2.8                 |
| <i>mrcA</i>                | fused penicillin-binding protein 1a:murein transglycosylase                     | 2.4                 |
| <i>mrda</i>                | penicillin-binding protein 2                                                    | 2.4                 |
| <i>mraY</i>                | phospho-N-acetylmuramoyl-pentapeptide-transferase                               | 2.5                 |
| <i>mreBCD</i> <sup>1</sup> | rod shape-determining protein                                                   | 2.4/2.5/3.2         |
| <i>murG</i>                | undecaprenyldiphospho-muramoylpentapeptide beta-N-acetylglucosaminyltransferase | 2.5                 |
| <i>murE</i>                | UDP-N-acetylmuramoylalanyl-D-glutamate--2,6-diaminopimelate ligase              | 2.7                 |
| <i>murF</i>                | UDP-N-acetylmuramoyl-tripeptide--D-alanyl-D-alanine ligase                      | 2.3                 |
| <i>mukEF</i> <sup>1</sup>  | chromosome condensin                                                            | 2.0/2.0             |
| <i>bcsQ</i>                | hypothetical protein /cell division protein                                     | 2.6                 |
| <i>mraY</i>                | phospho-N-acetylmuramoyl-pentapeptide transferase                               | 2.5                 |
| <i>tig</i>                 | peptidyl-prolyl cis/trans isomerase (trigger factor)                            | 2.4                 |
| <i>dicB</i>                | putative inhibitor of cell division encoded by cryptic prophage CP-933P/DicB    | -3.0                |
| <i>dicF</i>                | ncRNA                                                                           | -2.8                |

<sup>1</sup>Changes in expression for each gene of the complex or the same group are listed sequentially in respective order.

TABLE S2: *E. coli* O157:H7 genes that were highly upregulated only at 2 h exposure to cinnamaldehyde<sup>1</sup>

| Gene                                             | Function                                                                         | Fold change<br>(log <sub>2</sub> ) |
|--------------------------------------------------|----------------------------------------------------------------------------------|------------------------------------|
| <b>Energy derivation and oxidation reduction</b> |                                                                                  |                                    |
| <i>poxB</i>                                      | pyruvate dehydrogenase                                                           | 3.5                                |
| <i>cyoC</i>                                      | cytochrome o ubiquinol oxidase subunit III                                       | 3.1                                |
| <i>nfnB</i>                                      | dihydropteridine reductase, NAD(P)H-dependent, oxygen-insensitive                | 3.1                                |
| <i>acnA</i> <sup>2</sup>                         | aconitate hydratase 1                                                            | 3.0                                |
| <i>aceE</i> <sup>2</sup>                         | pyruvate dehydrogenase, decarboxylase component E1, thiamin-binding              | 2.9                                |
| <i>mdaA/nfsA</i> <sup>2</sup>                    | nitroreductase A, NADPH-dependent, FMN-dependent                                 | 2.9                                |
| <i>talA</i>                                      | transaldolase A                                                                  | 2.9                                |
| <i>aceF</i> <sup>3</sup>                         | dehydrogenase, dihydrolipoyltransacetylase component E2                          | 2.8                                |
| <i>gcd</i>                                       | glucose dehydrogenase                                                            | 2.8                                |
| <i>fumC</i> <sup>2</sup>                         | fumarate hydratase (fumarase C), aerobic Class II                                | 2.4                                |
| <i>betA</i>                                      | choline dehydrogenase                                                            | 2.2                                |
| <i>betB</i>                                      | betaine aldehyde dehydrogenase                                                   | 2.0                                |
| <i>mltD</i>                                      | membrane-bound lytic murein transglycosylase D                                   | 2.0                                |
| <i>gdhA</i>                                      | glutamate dehydrogenase                                                          | 2.0                                |
| <i>erpA</i>                                      | iron-sulfur cluster insertion protein                                            | 2.0                                |
| <i>deoB</i>                                      | Phosphopentomutase                                                               | 2.4                                |
| <i>deoC</i>                                      | 2-deoxyribose-5-phosphate aldolase, NAD(P)-linked                                | 2.3                                |
| <b>Translation/ protein synthesis</b>            |                                                                                  |                                    |
| <i>rpsV</i>                                      | 30S ribosomal subunit S22 / Stationary-phase-induced ribosome-associated protein | 2.5                                |
| <i>rnt</i>                                       | ribonuclease T                                                                   | 2.4                                |
| <b>Stress response</b>                           |                                                                                  |                                    |
| <i>inaA</i> <sup>2</sup>                         | conserved protein, acid-induced                                                  | 3.9                                |
| <i>sodA</i> <sup>2</sup>                         | superoxide dismutase, Mn                                                         | 3.5                                |

TABLE S2: continued

| Gene                                   | Function                                                           | Fold change<br>(log <sub>2</sub> ) |
|----------------------------------------|--------------------------------------------------------------------|------------------------------------|
| <i>katE</i>                            | hydroperoxidase II                                                 | 2.7                                |
| <i>gshB</i> <sup>2</sup>               | glutathione synthetase                                             | 2.1                                |
| <i>sufA</i>                            | iron-sulfur cluster assembly scaffold protein                      | 1.9                                |
| <i>otsB</i>                            | trehalose-6-phosphate phosphatase                                  | 3.3                                |
| <i>treF</i>                            | cytoplasmic trehalase                                              | 2.4                                |
| <i>osmY</i>                            | osmotically inducible periplasmic protein                          | 2.3                                |
| <i>hchA</i>                            | chaperone protein HchA                                             | 2.4                                |
| <b>Antibiotic resistance</b>           |                                                                    |                                    |
| <i>acrA</i> <sup>2</sup>               | acriflavin resistance protein A                                    | 2.9                                |
| <i>mdlAB</i> <sup>1</sup>              | fused predicted multidrug transporter                              | 2.9/2.3                            |
| <b>Membrane/membrane transport</b>     |                                                                    |                                    |
| <i>bhsA</i>                            | biofilm, cell surface and signaling protein                        | 4.6                                |
| <i>chaC</i>                            | cation transport protein                                           | 3.7                                |
| ECs2055                                | putative outer membrane receptor for iron transport                | 2.6                                |
| <i>ompX</i> <sup>2</sup>               | outer membrane protein X                                           | 1.9                                |
| <i>ylaC</i>                            | inner membrane protein, DUF1449 family                             | 2.2                                |
| <i>nlpD</i>                            | activator of AmiC murein hydrolase activity, lipoprotein (S-phase) | 2.0                                |
| <b>Amino acid synthesis/metabolism</b> |                                                                    |                                    |
| <i>shiA</i>                            | shikimate transporter                                              | 2.8                                |
| <i>ltaE</i>                            | L-allo-threonine aldolase                                          | 2.5                                |
| <b>Transcriptional regulators</b>      |                                                                    |                                    |
| <i>yqhC</i>                            | putative ARAC-type regulatory protein                              | 3.8                                |
| <i>fnr</i>                             | fumarate/nitrate reduction transcriptional regulator               | 2.0                                |
| <b>Other genes</b>                     |                                                                    |                                    |
| <i>yhbW</i>                            | predicted enzyme                                                   | 3.8                                |
| <i>hemB</i> <sup>2</sup>               | delta-aminolevulinic acid dehydratase                              | 2.3                                |
| <i>idi/</i>                            | isopentenyl-diphosphate delta-isomerase (isoprenoid                | 2.3                                |
| ECs3761                                | biosynthesis)                                                      |                                    |

<sup>1</sup>Changes in expression for each gene of the complex or the same group are listed sequentially in respective order.

<sup>2</sup>Genes that are directly or indirectly controlled by MarA (Barbosa and Levy, 2000; Ruiz et al., 2008).

TABLE S3: *E. coli* O157:H7 genes that were highly downregulated only at 2 h exposure to cinnamaldehyde<sup>1</sup>

| Gene                                             | Function                                                               | Fold change (log <sub>2</sub> )         |
|--------------------------------------------------|------------------------------------------------------------------------|-----------------------------------------|
| <b>Energy derivation and oxidation reduction</b> |                                                                        |                                         |
| <i>hycABCDEFHI</i> <sup>2</sup>                  | hydrogenase 3/ formate hydrogenlyase                                   | -3.9/-2.3/-3.1/-5.0/-4.5/-3.5/-2.0/-2.0 |
| <i>hyaABC</i> <sup>2</sup>                       | hydrogenase-1                                                          | -4.0/-3.1/-1.9                          |
| <i>hydN</i>                                      | electron transport protein HydN                                        | -4.1                                    |
| <i>fdhF</i>                                      | formate dehydrogenase H                                                | -3.4                                    |
| <i>frdABCD</i> <sup>2</sup>                      | fumarate reductase flavoprotein subunit (anaerobic)                    | -2.7/-3.2/-2.2/-3.4                     |
| <i>dmsABC</i> <sup>2</sup>                       | anaerobic dimethyl sulfoxide reductase                                 | -2.8/-3.0/-2.0                          |
| <i>nuoA</i>                                      | NADH dehydrogenase subunit A                                           | -2.1                                    |
| <i>nrfA</i>                                      | cytochrome c552 /nitrite reductase                                     | -2.0                                    |
| <i>hypB</i>                                      | hydrogenase nickel incorporation protein HypB                          | -2.1                                    |
| <i>nrdG</i>                                      | anaerobic ribonucleotide reductase activating protein                  | -2.1                                    |
| <i>dcuAB</i> <sup>2</sup>                        | anaerobic C4-dicarboxylate transporter                                 | -2.1/-3.5                               |
| <b>DNA metabolism</b>                            |                                                                        |                                         |
| <i>priB</i>                                      | primosomal replication protein N                                       | -2.7                                    |
| <i>cnu</i>                                       | oriC-binding nucleoid-associated protein                               | -2.4                                    |
| <b>Translation/ protein synthesis</b>            |                                                                        |                                         |
| <i>tdcF</i>                                      | predicted L-PSP (mRNA) endoribonuclease                                | -2.1                                    |
| <i>rpmEG</i> <sup>2</sup>                        | 50S ribosomal protein L31/L33                                          | -2.1/-2.9                               |
| <i>rplOP</i> <sup>2</sup>                        | 50S ribosomal protein L15/16                                           | -2.1/-2.2                               |
| <i>rpsHRS</i> <sup>2</sup>                       | 30S ribosomal protein S8/S18/S19                                       | -3.2/-2.2/-2.3                          |
| <i>rpsH</i>                                      | 30S ribosomal protein S8                                               | -3.2                                    |
| <b>Stress response</b>                           |                                                                        |                                         |
| <i>gadE</i> <sup>3</sup>                         | DNA-binding transcriptional activator involved in acid resistance      | -3.6                                    |
| <i>gadAB</i> <sup>2,3</sup>                      | glutamate decarboxylase alpha                                          | -4.1/-4.8                               |
| <i>gadC</i> <sup>3</sup>                         | glutamate:gamma-aminobutyric acid antiporter/ acid sensitivity protein | -3.5                                    |
| <i>hdeAB</i> <sup>2,3</sup>                      | acid-resistance protein                                                | -4.8/-6.0                               |

TABLE S3: continued

| Gene                                   | Function                                                                                                                       | Fold change (log <sub>2</sub> ) |
|----------------------------------------|--------------------------------------------------------------------------------------------------------------------------------|---------------------------------|
| <i>hdeD</i> <sup>3</sup>               | acid-resistance membrane protein                                                                                               | -4.8                            |
| <b>Membrane/membrane transport</b>     |                                                                                                                                |                                 |
| <i>malEG</i> <sup>2</sup>              | maltose transporter                                                                                                            | -4.0/-2.5                       |
| <i>wbdNO</i> <sup>2</sup>              | putative glycosyl transferase                                                                                                  | -3.1/-2.0                       |
| <i>manXYZ</i> <sup>2</sup>             | PTS system mannose-specific transporter                                                                                        | -2.3/-2.3/-2.7                  |
| <i>lamB</i>                            | maltose outer membrane porin (malto porin)                                                                                     | -2.5                            |
| <i>afuB</i>                            | putative permease component of transport system for ferric iron                                                                | -2.1                            |
| <i>ydeQRS</i> <sup>2</sup>             | predicted fimbrial-like protein                                                                                                | -2.5/-3.8/-3.6                  |
| <i>wzx</i>                             | O antigen flippase                                                                                                             | -2.0                            |
| <i>wzy</i>                             | O antigen polymerase                                                                                                           | -3.0                            |
| <i>wbdR</i>                            | acetyl transferase; O-antigen biosynthesis                                                                                     | -2.1                            |
| <i>ompF</i> <sup>3</sup>               | outer membrane protein F                                                                                                       | -2.2                            |
| <i>ompC</i>                            | outer membrane porin protein C                                                                                                 | -2.8                            |
| <i>pgaAB</i>                           | biofilm adhesin polysaccharide PGA export/ PGA export lipoprotein with a polysaccharide deacetylase activity needed for export | -2.6/-2.3                       |
| <i>ycdT</i>                            | diguanylate cyclase                                                                                                            | -2.8                            |
| <i>etk</i>                             | cryptic autophosphorylating protein tyrosine kinase Etk                                                                        | -2.1                            |
| <b>Transcription</b>                   |                                                                                                                                |                                 |
| <i>nhaR</i>                            | DNA-binding transcriptional activator                                                                                          | -2.0                            |
| <b>Amino acid synthesis/metabolism</b> |                                                                                                                                |                                 |
| <i>cysW</i>                            | sulfate/thiosulfate transporter permease subunit                                                                               | -2.7                            |
| <i>cysD</i>                            | sulfate adenylyltransferase subunit 2                                                                                          | -3.2                            |
| <i>aspA</i>                            | aspartate ammonia-lyase                                                                                                        | -4.2                            |

<sup>1</sup> Genes with expression value  $\leq -1.9$  are presented.

<sup>2</sup> Changes in expression for each gene of the complex or the same group are listed sequentially in respective order.

<sup>3</sup>Genes that are directly or indirectly controlled by MarA (Barbosa and Levy, 2000; Ruiz et al., 2008).

References:

**Barbosa TM, Levy SB.** 2000. Differential expression of over 60 chromosomal genes in *Escherichia coli* by constitutive expression of MarA. *J. Bacteriol.* 182:3467-3474.

**Ruiz C, McMurry LM, Levy SB.** 2008. Role of the multidrug resistance regulator MarA in global regulation of the *hdeAB* acid resistance operon in *Escherichia coli*. *J. Bacteriol.* 190:1290-1297.

TABLE S4: *E. coli* O157:H7 genes that were highly upregulated only at 4 h exposure to cinnamaldehyde<sup>1</sup>

| Gene                                             | Function                                                              | Fold change (log <sub>2</sub> ) |
|--------------------------------------------------|-----------------------------------------------------------------------|---------------------------------|
| <b>Motility and chemotaxis</b>                   |                                                                       |                                 |
| <i>motB</i>                                      | flagellar motor protein                                               | 6.8                             |
| <i>motA</i>                                      | flagellar motor protein                                               | 6.7                             |
| <i>fliC</i>                                      | flagellin                                                             | 5.6                             |
| <i>fliD</i>                                      | flagellar capping protein                                             | 5.2                             |
| <i>tap</i>                                       | methyl-accepting protein IV                                           | 5.6                             |
| <i>cheA</i>                                      | chemotaxis protein                                                    | 5.6                             |
| <i>cheZ</i>                                      | chemotaxis regulator CheZ                                             | 4.5                             |
| <i>cheW</i>                                      | purine-binding chemotaxis protein                                     | 4.5                             |
| <i>cheY</i>                                      | chemotaxis regulator transmitting signal to flagellar motor component | 4.0                             |
| <i>tar</i>                                       | methyl-accepting chemotaxis protein II                                | 4.8                             |
| <i>fliS</i>                                      | flagellar protein potentiates polymerization                          | 4.6                             |
| <i>flgK</i>                                      | flagellar hook-filament junction protein 1                            | 4.1                             |
| <i>flgN</i>                                      | flagella synthesis protein                                            | 3.6                             |
| <i>fliT</i>                                      | flagellar biosynthesis protein                                        | 3.4                             |
| <i>flgM</i>                                      | anti-sigma factor for FliA                                            | 3.2                             |
| <i>cheR</i>                                      | chemotaxis methyltransferase                                          | 3.1                             |
| <i>flhC</i>                                      | transcriptional activator FlhC                                        | 2.2                             |
| <i>tsr</i>                                       | methyl-accepting chemotaxis protein I                                 | 2.6                             |
| <i>fliA</i>                                      | flagellar biosynthesis sigma factor ( $\sigma^{28}$ )                 | 2.6                             |
| <i>flhD</i>                                      | transcriptional activator FlhD                                        | 2.6                             |
| <i>flgM</i>                                      | anti-sigma factor for FliA ( $\sigma^{28}$ )                          | 3.2                             |
| <i>yhjH</i>                                      | cyclic-di-GMP phosphodiesterase, FlhDC-regulated                      | 4.2                             |
| <b>Energy generation and oxidation reduction</b> |                                                                       |                                 |
| <i>atpABDEFGH</i> <sup>2</sup>                   | F <sub>0</sub> F <sub>1</sub> ATP synthase                            | 2.9/2.0/2.7/2.7/2.8/2.8/<br>3.0 |
| <i>nuoEHIJKL</i> <sup>2</sup>                    | NADH:ubiquinone oxidoreductase                                        | 2.0/2.0/2.7/2.0/2.4/2.5         |



TABLE S4: continued

| Gene                                  | Function                                                                                            | Fold change (log <sub>2</sub> ) |
|---------------------------------------|-----------------------------------------------------------------------------------------------------|---------------------------------|
| <i>torA</i>                           | trimethylamine-N-oxide reductase 1                                                                  | 5.5                             |
| <i>torC</i>                           | trimethylamine N-oxide (TMAO) reductase I<br>cytochrome c-type subunit                              | 6.2                             |
| <i>torD</i>                           | chaperone involved in maturation of TorA<br>subunit of trimethylamine N-oxide reductase<br>system I | 5.3                             |
| <i>rsxABC</i> <sup>2</sup>            | electron transport complex                                                                          | 4.1/4.1/3.8                     |
| <b>DNA metabolism</b>                 |                                                                                                     |                                 |
| <i>dnaB</i>                           | replicative DNA helicase                                                                            | 3.2                             |
| <i>fimB</i>                           | tyrosine recombinase/inversion of on/off<br>regulator of fimA                                       | 2.3                             |
| <i>yjvV</i>                           | predicted DNase                                                                                     | 3.5                             |
| <i>nrdA</i>                           | ribonucleotide-diphosphate reductase subunit<br>alpha                                               | 3.0                             |
| <i>dnaE</i>                           | DNA polymerase III subunit alpha                                                                    | 2.5                             |
| <i>hola</i>                           | DNA polymerase III subunit delta                                                                    | 2.1                             |
| ECs4325                               | putative O-methyltransferase                                                                        | 5.0                             |
| <b>Translation/ Protein synthesis</b> |                                                                                                     |                                 |
| <i>hemK</i>                           | N5-glutamine S-adenosyl-L-methionine-<br>dependent methyltransferase                                | 3.6                             |
| <i>tgt</i>                            | queuine tRNA-ribosyltransferase                                                                     | 3.1                             |
| <i>rlmH</i>                           | rRNA large subunit methyltransferase                                                                | 2.7                             |
| <i>rhIE</i>                           | ATP-dependent RNA helicase RhIE                                                                     | 3.1                             |
| <i>rpsJP</i> <sup>2</sup>             | 30S ribosomal protein S10/S16                                                                       | 2.5/2.1                         |
| <i>rplBDV</i> <sup>2</sup>            | 50S ribosomal protein L2/L4/L22                                                                     | 2.4/2.3/2.1                     |
| <i>rpmH</i>                           | 50S ribosomal protein L34                                                                           | 2.0                             |
| <i>glyS</i> <sup>2</sup>              | Glycyl-tRNA synthetase                                                                              | 2.0                             |
| <i>pheST</i> <sup>2</sup>             | Phenylalanyl-tRNA synthetase                                                                        | 2.8/2.2                         |
| <i>prfAC</i> <sup>2</sup>             | Peptide chain release factor 1/2/3                                                                  | 3.2/2.2                         |
| <i>rnpA</i>                           | protein C5 component of RNase P                                                                     | 3.4                             |

TABLE S4: continued

| Gene                               | Function                                                                             | Fold change (log <sub>2</sub> ) |
|------------------------------------|--------------------------------------------------------------------------------------|---------------------------------|
| <b>Stress response</b>             |                                                                                      |                                 |
| <i>cadA</i>                        | lysine decarboxylase, acid-inducible                                                 | 4.0                             |
| <i>cadB</i>                        | lysine/cadaverine antiporter                                                         | 4.0                             |
| <i>adiA</i>                        | biodegradative arginine decarboxylase                                                | 3.7                             |
| <i>adiC</i>                        | arginine:agmatin antiporter                                                          | 3.2                             |
| <i>cpxP</i>                        | periplasmic repressor CpxP                                                           | 4.3                             |
| <i>degP</i>                        | serine endoprotease                                                                  | 3.1                             |
| <i>gppA</i>                        | guanosine pentaphosphate phosphohydrolase                                            | 3.0                             |
| <b>Antibiotic resistance</b>       |                                                                                      |                                 |
| <i>acrB</i>                        | acriflavin resistance protein B                                                      | 2.8                             |
| <i>acrD</i>                        | aminoglycoside/multidrug efflux system                                               | 2.6                             |
| <i>ampC</i>                        | beta-lactamase                                                                       | 2.2                             |
| <i>emrAD</i> <sup>2</sup>          | multidrug resistance secretion protein                                               | 2.2/1.8                         |
| <i>mdtIJ</i> <sup>2</sup>          | multidrug efflux system protein                                                      | 2.7/4.6                         |
| <b>Membrane/membrane transport</b> |                                                                                      |                                 |
| <i>spr</i>                         | mutational suppressor of <i>prc</i> thermosensitivity,<br>outer membrane lipoprotein | 4.7                             |
| <i>lpxT</i>                        | Lipid A 1-diphosphate synthase/ lipid A 1-<br>phosphate phosphotransferase           | 4.4                             |
| <i>eptB</i>                        | KDO phosphoethanolamine transferase, Ca <sup>2+</sup> -<br>inducible                 | 4.3                             |
| <i>waaL</i>                        | lipid A-core:surface polymer ligase                                                  | 4.2                             |
| <i>gfcE</i>                        | predicted lipoprotein required for formation<br>of the O-antigen capsule             | 3.7                             |
| ECs4327                            | putative phospholipid biosynthesis<br>acyltransferase                                | 3.9                             |
| ECs4324                            | lipoprotein                                                                          | 4.1                             |
| ECs4329                            | acyl carrier protein                                                                 | 3.9                             |
| ECs4332                            | putative (3R)-hydroxymyristoyl-[acyl carrier<br>protein] dehydratase                 | 3.6                             |
| <i>ddg</i>                         | lipid A biosynthesis palmitoleoyl acyltransferase                                    | 3.0                             |

TABLE S4: continued

| Gene                      | Function                                                                 | Fold change (log <sub>2</sub> ) |
|---------------------------|--------------------------------------------------------------------------|---------------------------------|
| <i>lgt</i>                | prolipoprotein diacylglyceryl transferase                                | 3.0                             |
| <i>acpT</i>               | holo-(acyl carrier protein) synthase 2                                   | 2.8                             |
| <i>mipA</i>               | scaffolding protein for murein synthesizing machinery                    | 3.1                             |
| <i>prc</i>                | carboxy-terminal protease for penicillin-binding protein 3               | 3.3                             |
| <i>setB</i>               | lactose/glucose efflux system                                            | 3.4                             |
| <i>oppCD</i> <sup>2</sup> | oligopeptide transport system                                            | 3.3/2.9                         |
| <i>lpxB</i>               | lipid-A-disaccharide synthase                                            | 2.7                             |
| <i>miaF</i>               | ABC transporter maintaining OM lipid asymmetry, ATP-binding protein      | 2.7                             |
| <i>accBC</i> <sup>2</sup> | acetyl-CoA carboxylase carboxyltransferase                               | 2.5/2.1                         |
| <i>aaeB</i> <sup>2</sup>  | p-hydroxybenzoic acid efflux system                                      | 2.0                             |
| <i>nupC</i>               | permease of transport system for 3 nucleosides                           | 2.6                             |
| <i>yejE</i>               | putative transport system permease protein                               | 2.4                             |
| <b>Transcription</b>      |                                                                          |                                 |
| <i>fis</i>                | global DNA-binding transcriptional dual regulator                        | 2.9                             |
| <i>malT</i>               | transcriptional regulator MalT                                           | 3.1                             |
| <i>mcbR</i>               | colanic acid and biofilm gene transcriptional regulator, MqsR-controlled | 3.3                             |
| <i>grlR</i>               | negative regulator GrlR                                                  | 2.2                             |

<sup>1</sup> Genes with expression value  $\geq 1.8$  are presented.

<sup>2</sup> Changes in expression for each gene of the complex or the same group are listed sequentially in respective order.

TABLE S5: *E. coli* O157:H7 genes that were highly downregulated only at 4 h exposure to cinnamaldehyde<sup>1</sup>

| Gene                                 | Function                                                      | Fold change (log <sub>2</sub> ) |
|--------------------------------------|---------------------------------------------------------------|---------------------------------|
| <b>Stress response</b>               |                                                               |                                 |
| <i>ibpAB</i> <sup>2</sup>            | Small heat shock protein                                      | -2.9/-3.6                       |
| <i>htpG</i>                          | heat shock protein 90                                         | -2.7                            |
| <i>rmf</i>                           | ribosome modulation factor (heat resistant)                   | -2.5                            |
| <i>hspQ</i>                          | heat shock protein HspQ                                       | -2.0                            |
| <i>grxA</i>                          | glutaredoxin 1                                                | -5.0                            |
| <i>gadY</i>                          | ncRNA (acid resistant)                                        | -3.0                            |
| <i>cspD</i>                          | stationary phase/starvation inducible regulatory protein CspD | -2.8                            |
| <i>uspBDF</i> <sup>2</sup>           | universal stress protein                                      | -2.1/-2.2/-3.0                  |
| <i>ldhA</i>                          | fermentative D-lactate dehydrogenase, NAD-dependent           | -2.2                            |
| ECs1120                              | putative copper/zinc-superoxide dismutase                     | -2.5                            |
| <i>osmC</i>                          | osmotically inducible protein                                 | -2.1                            |
| <i>osmB</i>                          | osmotically inducible lipoprotein                             | -3.4                            |
| <b>Translation/protein synthesis</b> |                                                               |                                 |
| <i>higAB</i> <sup>2</sup>            | HigB-HigA toxin-antitoxin system                              | -2.3/-4.0                       |
| <i>rdlB</i>                          | ncRNA                                                         | -3.3                            |
| <i>sokC</i>                          | ncRNA                                                         | -2.6                            |
| <b>Membrane/membrane transport</b>   |                                                               |                                 |
| <i>macB</i>                          | macrolide transporter ATP-binding permease protein            | -3.3                            |
| <i>cysP</i>                          | thiosulfate transporter subunit                               | -2.9                            |
| <i>slp</i>                           | membrane protein induced after carbon starvation              | -2.9                            |
| <i>ygdl</i>                          | lipoprotein ygdI precursor                                    | -4.2                            |
| <i>yggA</i>                          | arginine exporter protein                                     | -2.1                            |
| <i>ybhL</i>                          | inner membrane protein, UPF0005 family                        | -2.3                            |
| <i>yohC</i>                          | inner membrane protein                                        | -2.2                            |
| <i>ydhC</i>                          | inner membrane transport protein YdhC                         | -2.2                            |
| <i>ydhC</i>                          | inner membrane transport protein YdhC                         | -2.2                            |

TABLE S5: continued

| Gene                     | Function                                                    | Fold change (log <sub>2</sub> ) |
|--------------------------|-------------------------------------------------------------|---------------------------------|
| <b>Transcription</b>     |                                                             |                                 |
| <i>zntR</i>              | DNA-binding transcriptional activator in response to Zn(II) | -3.6                            |
| <i>glnK</i>              | nitrogen regulatory protein P-II                            | -2.3                            |
| <i>yafC</i>              | putative transcriptional regulator YafC                     | -2.1                            |
| <b>Biofilm formation</b> |                                                             |                                 |
| <i>bdm</i>               | biofilm-dependent modulation                                | -2.3                            |
| <i>bssR</i>              | biofilm formation regulatory protein BssR                   | -3.5                            |
| <b>Others</b>            |                                                             |                                 |
| <i>ryjA</i>              | ncRNA                                                       | -3.1                            |

<sup>1</sup>Genes with expression value  $\leq -2.0$  are presented.

<sup>2</sup>Changes in expression for each gene of the complex or the same group are listed sequentially in respective order.
